# Supplementary material
Source: PubMed Central journal article supplement (PMC6527121)
Supplement: NIHMS1525288-supplement-1.pdf [file NIHMS1525288-supplement-1.pdf]

## Online Appendix

**Online Table 1. Baseline characteristics and risk factor profile of Black and White Men and Women in the PC Derivation and External Validation Samples**

|                                                 | Black Men   |             | Black Women |             | White Men   |             | White Women |             |
|-------------------------------------------------|-------------|-------------|-------------|-------------|-------------|-------------|-------------|-------------|
|                                                 | PC          | JHS         | PC          | JHS         | PC          | PREVEND     | PC          | PREVEND     |
|                                                 | Derivation  | Validation  | Derivation  | Validation  | Derivation  | Validation  | Derivation  | Validation  |
|                                                 | N=933       | N=1066      | N=1628      | N=1704      | N=3997      | N=3206      | N=5213      | N=3493      |
| <b>Mean age, years (SD)</b>                     | 48.9 (13.1) | 49.4 (11.7) | 49.6 (12.7) | 50.2 (11.5) | 53.1 (11.7) | 50.3 (12.4) | 53.9 (11.6) | 48.4 (12.0) |
| <b>Diabetes, n (%)</b>                          | 106 (11)    | 102 (10)    | 184 (11)    | 200 (12)    | 271 (7)     | 126 (4)     | 251 (5)     | 106 (3)     |
| <b>Mean fasting glucose, mg/dL (SD)</b>         | 102 (33)    | 98 (31)     | 102 (36)    | 96 (31)     | 101 (25)    | 90 (22)     | 97 (25)     | 85 (20)     |
| <b>Diabetes treatment, n (%)</b>                | 66 (7)      | 69 (7)      | 110 (7)     | 156 (10)    | 98 (2)      | 46 (1)      | 95 (2)      | 53 (2)      |
| <b>Current smoking, n (%)</b>                   | 269 (29)    | 190 (18)    | 387 (24)    | 159 (9)     | 806 (20)    | 1216 (38)   | 1067 (20)   | 1336 (38)   |
| <b>Mean systolic blood pressure, mm Hg (SD)</b> | 124 (19)    | 127 (16)    | 124 (21)    | 124 (16)    | 122 (17)    | 134 (18)    | 119 (19)    | 124 (21)    |
| <b>Hypertension treatment, n (%)</b>            | 312 (33)    | 330 (34)    | 623 (38)    | 727 (45)    | 932 (23)    | 440 (14)    | 1268 (24)   | 493 (14)    |
| <b>Mean total cholesterol, mg/dL (SD)</b>       | 193 (43)    | 197 (40)    | 200 (44)    | 197 (38)    | 204 (38)    | 221 (43)    | 211 (42)    | 218 (45)    |
| <b>Mean HDL cholesterol, mg/dL (SD)</b>         | 49 (14)     | 45 (12)     | 57 (16)     | 54 (14)     | 44 (12)     | 45 (12)     | 58 (16)     | 58 (16)     |
| <b>Mean BMI, kg/m<sup>2</sup></b>               | 28.4 (5.0)  | 30.0 (6.1)  | 30.6 (6.8)  | 33.2 (7.8)  | 27.3 (3.9)  | 26.3 (3.6)  | 26.3 (5.3)  | 25.9 (4.7)  |
| <b>Mean QRS duration, msec (SD)</b>             | 93 (14)     | 97 (14)     | 86 (12)     | 91 (12)     | 93 (15)     | 103 (13)    | 85 (12)     | 93 (12)     |

PC indicates pooled cohort, which includes ARIC, CARDIA, CHS, FOF, and MESA; JHS indicates Jackson Heart Study; PREVEND indicates Prevention of RENal and Vascular ENd-stage Disease cohort

**Online Table 2: Baseline characteristics of the Pooled Cohort Validation sample**

|                                                 | <b>White<br/>Men</b> | <b>White<br/>Women</b> | <b>Black<br/>Men</b> | <b>Black<br/>Women</b> |
|-------------------------------------------------|----------------------|------------------------|----------------------|------------------------|
|                                                 | <b>N=1075</b>        | <b>N=1631</b>          | <b>N=4011</b>        | <b>N=5053</b>          |
| <b>Mean age, years (SD)</b>                     | 49.0 (13.0)          | 50.2 (12.4)            | 53.2 (11.5)          | 53.9 (13.0)            |
| <b>Diabetes, n (%)</b>                          | 131 (12)             | 200 (12)               | 265 (7)              | 256 (5)                |
| <b>Mean fasting glucose, mg/dL (SD)</b>         | 103 (35)             | 103 (38)               | 101 (23)             | 97 (24)                |
| <b>Diabetes treatment, n (%)</b>                | 85 (8)               | 120 (7)                | 93 (2)               | 86 (2)                 |
| <b>Current smoking, n (%)</b>                   | 311 (29)             | 367 (23)               | 783 (20)             | 1077 (21)              |
| <b>Mean systolic blood pressure, mm Hg (SD)</b> | 124 (18)             | 124 (21)               | 122 (17)             | 119 (18)               |
| <b>Hypertension treatment, n (%)</b>            | 337 (31)             | 651 (40)               | 905 (23)             | 1234 (24)              |
| <b>Mean total cholesterol, mg/dL (SD)</b>       | 194 (42)             | 199 (42)               | 204 (39)             | 211 (41)               |
| <b>Mean HDL cholesterol, mg/dL (SD)</b>         | 49 (14)              | 57 (16)                | 44 (12)              | 58 (16)                |
| <b>Mean BMI, kg/m<sup>2</sup></b>               | 28.2 (5.0)           | 30.7 (6.7)             | 27.2 (3.9)           | 26.3 (5.4)             |
| <b>Mean QRS duration, msec (SD)</b>             | 92 (13)              | 86 (12)                | 92 (15)              | 85 (12)                |

**Online Table 3. Equation coefficients and p-values for the Pooled Cohort Equations to Prevent Heart Failure**

|                                         | White Male  |         | White Female |         | Black Male  |         | Black Female |         |
|-----------------------------------------|-------------|---------|--------------|---------|-------------|---------|--------------|---------|
|                                         | Coefficient | P value | Coefficient  | P value | Coefficient | P value | Coefficient  | P value |
| <b>Ln Age (y)</b>                       | 41.94       | < .01   | 20.55        | 0.05    | 2.88        | < .01   | 51.75        | < .01   |
| <b>Ln Age, Squared</b>                  | -0.88       | 0.05    | N/A          | N/A     | N/A         | N/A     | N/A          | N/A     |
| <b>Ln Treated Systolic BP (mm Hg)</b>   | 1.03        | < .01   | 12.95        | 0.13    | 2.31        | < .01   | 29.0         | 0.02    |
| <b>Ln Age×Ln Treated Systolic BP</b>    | N/A         | N/A     | -2.96        | 0.16    | N/A         | N/A     | -6.59        | 0.03    |
| <b>Ln Untreated Systolic BP (mm Hg)</b> | 0.91        | < .01   | 11.86        | 0.18    | 2.17        | < .01   | 28.18        | 0.03    |
| <b>Ln Age×Ln Untreated Systolic BP</b>  | N/A         | N/A     | -2.73        | 0.20    | N/A         | N/A     | -6.42        | 0.04    |
| <b>Current Smoker (1=Yes, 0=No)</b>     | 0.74        | <.01    | 11.02        | <.01    | 1.66        | 0.69    | 0.76         | < .01   |
| <b>Ln Age×Current Smoker</b>            | N/A         | N/A     | -2.50        | <.01    | -0.25       | 0.81    | N/A          | N/A     |
| <b>Ln Treated glucose (mg/dL)</b>       | 0.90        | <.01    | 1.04         | <.01    | 0.64        | 0.10    | 0.97         | < .01   |
| <b>Ln Untreated glucose (mg/dL)</b>     | 0.78        | <.01    | 0.91         | <.01    | 0.58        | 0.19    | 0.80         | < .01   |
| <b>Ln Total Cholesterol (mg/dL)</b>     | 0.49        | 0.04    | N/A          | N/A     | N/A         | N/A     | 0.32         | 0.40    |
| <b>Ln HDL-C (mg/dL)</b>                 | -0.44       | 0.02    | -0.07        | 0.67    | -0.81       | 0.03    | N/A          | N/A     |
| <b>Ln BMI (Kg/m<sup>2</sup>)</b>        | 37.2        | <.01    | 1.33         | <.01    | 1.16        | 0.09    | 21.24        | 0.01    |
| <b>Ln Age× Ln BMI</b>                   | -8.83       | <.01    | N/A          | N/A     | N/A         | N/A     | -5.0         | 0.02    |
| <b>Ln QRS duration (msec)</b>           | 0.63        | 0.02    | 1.06         | <.01    | 0.73        | 0.25    | 1.27         | 0.04    |

**Online Table 4: Comparison of Model Performance for HF risk estimation with existing Cardiovascular Risk Scores and the Pooled Cohort Equations to Prevent Heart Failure for each race and sex group**

|              | D'Agostino 2008 CVD  |                     | FRS-ATPIII           |                     | PCE-ASCVD            |                     | PCP-HF Score         |                     |
|--------------|----------------------|---------------------|----------------------|---------------------|----------------------|---------------------|----------------------|---------------------|
|              | C statistics         | GND Chi-sq, P value |
| White Male   | 0.80<br>(0.77, 0.83) | 572.6<br>( $<.01$ ) | 0.77<br>(0.74, 0.81) | 233.3<br>( $<.01$ ) | 0.79<br>(0.75, 0.82) | 211.3<br>( $<.01$ ) | 0.83<br>(0.80, 0.86) | 9.45<br>(0.15)      |
| White Female | 0.90<br>(0.76, 0.83) | 259.2<br>( $<.01$ ) | 0.78<br>(0.74, 0.82) | 97.2<br>( $<.01$ )  | 0.83<br>(0.79, 0.86) | 109.8<br>( $<.01$ ) | 0.84<br>(0.81, 0.88) | 7.64<br>(0.17)      |
| Black Male   | 0.78<br>(0.71, 0.84) | 103.7<br>( $<.01$ ) | 0.72<br>(0.65, 0.79) | 44.1<br>( $<.01$ )  | 0.76<br>(0.69, 0.83) | 34.9<br>( $<.01$ )  | 0.83<br>(0.78, 0.87) | 3.12<br>(0.68)      |
| Black Female | 0.75<br>(0.68, 0.82) | 82.9<br>( $<.01$ )  | 0.75<br>(0.69, 0.82) | 53.2<br>( $<.01$ )  | 0.73<br>(0.66, 0.80) | 34.8<br>( $<.01$ )  | 0.80<br>(0.73, 0.86) | 3.45<br>(0.75)      |

**Online Table 5: Characteristics, Risk Factors, and Endpoints of Previously Published HF Risk Scores and the PCP-HF Risk Score**

| Risk Score Information                     |                              |                                                                 |                                                                     |                       |                       |                     | Risk Factors/Covariates/Endpoint |     |      |           |     |       |            |          |          |    |                 |       |         |     |            |               |                                |          |                 |
|--------------------------------------------|------------------------------|-----------------------------------------------------------------|---------------------------------------------------------------------|-----------------------|-----------------------|---------------------|----------------------------------|-----|------|-----------|-----|-------|------------|----------|----------|----|-----------------|-------|---------|-----|------------|---------------|--------------------------------|----------|-----------------|
| Risk Equation                              | Cohorts and Countries        | Participants' Race/Ethnic Background                            | Participants' Hx of CVD                                             | Participant Age Range | Data Collection Years | Risk Window (Years) | Age                              | Sex | Race | Hx of CHD | SBP | BP Tx | Total Chol | LDL Chol | HDL Chol | DM | Fasting Glucose | DM Tx | Smoking | BMI | Heart Rate | ECG           | Biomarkers (e.g. Albumin, BNP) | Endpoint |                 |
| Framingham Global                          | Framingham USA               | European-American                                               | Free of CHD and stroke at baseline                                  | 30-74 years           | 1968-1987             | 12                  | X                                | X   |      |           | X   | X     | X          |          | X        | X  |                 |       | X       |     |            |               |                                |          | CHD, Stroke, HF |
| Framingham HF                              | Framingham USA               | European-American                                               | All had history of coronary heart disease, valvular disease, or htn | 45-94 years           | 1949-1987             | 4                   | X                                | X   |      | X         | X   |       |            |          |          | X  |                 |       |         |     | X          | X (LVH)       |                                |          | HF              |
| Health ABC                                 | Health ABC USA               | European-American and African-American                          | Included participants with hx of CHD or stroke                      | 70-79 years           | 1997-2002             | 5                   | X                                |     |      | X         | X   |       |            |          |          |    | X               |       | X       |     | X          | X (LVH)       | X                              |          | HF              |
| MESA                                       | MESA USA                     | European-American, Hispanic, African-American, Chinese-American | Free of CHD and stroke at baseline                                  | 45-84 years           | 2000-2007             | 5                   | X                                | X   |      |           | X   |       |            |          |          | X  |                 |       | X       | X   | X          |               | X                              |          | HF              |
| ARIC                                       | ARIC USA                     | European-American, African-American                             | Included participants with hx of CHD                                | 45-64 years           | 1987-1998             | 15.5                | X                                | X   | X    |           |     |       |            |          |          |    |                 |       |         |     |            |               | X                              |          | HF              |
| International Collaboration on HF Subtypes | Framingham CHS, and PREVENT  | European-American, European, and African-American               | Included participants with hx of CHD and stroke                     | 30-84 years           | 1979-2010             | 12                  | X                                | X   |      | X         | X   | X     |            |          |          | X  |                 |       | X       | X   |            | X (LVH, LBBB) |                                |          | HFpEF, HFpEF    |
| PCP-HF (Current Score)                     | FOF, CHS, ARIC, CARDIA, MESA | European-American, African-American                             | Free of CHD and stroke at baseline                                  | 30-80 years           | 1985-2002             | 10                  | X                                | X   | X    |           | X   | X     | X          |          | X        |    | X               | X     | X       | X   |            | X (QRS)       |                                |          | HF              |

**Online Table 6. Baseline Characteristics of Lowest and Highest Decile Risk Group in the Derivation Sample of the PC**

|                                                 | Black Men     |                | Black Women   |                | White Men     |                | White Women   |                |
|-------------------------------------------------|---------------|----------------|---------------|----------------|---------------|----------------|---------------|----------------|
|                                                 | Lowest decile | Highest decile |
| <b>Mean age, years (SD)</b>                     | 32.3 (2.4)    | 64.1 (8.5)     | 32.5 (2.2)    | 60.2 (8.4)     | 33.4 (2.5)    | 68.3 (6.9)     | 34.0 (2.6)    | 70.0 (6.5)     |
| <b>Mean fasting glucose, mg/dL (SD)</b>         | 86 (9)        | 127 (48)       | 83 (7)        | 157 (72)       | 90 (10)       | 123 (47)       | 85.6 (14.5)   | 120 (53)       |
| <b>Mean systolic blood pressure, mm Hg (SD)</b> | 108 (9)       | 148 (21)       | 101 (8)       | 148 (25)       | 110 (11)      | 137 (21)       | 102 (9)       | 137 (19)       |
| <b>Mean total cholesterol, mg/dL (SD)</b>       | 176 (33)      | 185 (40)       | 170 (32)      | 214 (48)       | 179 (35)      | 200 (39)       | 174 (32)      | 222 (43)       |
| <b>Mean HDL cholesterol, mg/dL (SD)</b>         | 58 (13)       | 42 (11)        | 58 (13)       | 52 (13)        | 48 (11)       | 42 (12)        | 58 (12)       | 54 (15)        |
| <b>Mean BMI, kg/m<sup>2</sup></b>               | 24.3 (3.7)    | 31.1 (5.1)     | 23.5 (3.2)    | 34.5 (7.4)     | 24.3 (2.5)    | 28.2 (4.5)     | 23.7 (4.7)    | 29.4 (5.0)     |
| <b>Mean QRS duration, msec (SD)</b>             | 84 (7)        | 104 (21)       | 79 (7)        | 96 (20)        | 84 (11)       | 101 (20)       | 80 (8)        | 92 (16)        |

PC indicates pooled cohort, which includes ARIC, CARDIA, CHS, FOF, and MESA

**Online Table 7. Varying Risk Factor Profiles and Estimated 10-year HF Risk**

| Demographics                                  | Age | Smoking | SBP | RISK FACTOR LEVELS |                    |                       |                    |                      |                    |                 | Predicted |
|-----------------------------------------------|-----|---------|-----|--------------------|--------------------|-----------------------|--------------------|----------------------|--------------------|-----------------|-----------|
|                                               |     |         |     | BP<br>treatment    | Fasting<br>glucose | Diabetes<br>treatment | Body mass<br>index | Total<br>cholesterol | HDL<br>cholesterol | QRS<br>Duration | HF Risk % |
| <b>White Male (Optimal RF profile)</b>        | 50  | Never   | 120 | No                 | 90                 | No                    | 22                 | 180                  | 55                 | 90              | 0.4%      |
| <b>White Male (Intermediate RF profile)</b>   | 50  | Never   | 130 | No                 | 100                | No                    | 28                 | 200                  | 50                 | 120             | 1.0%      |
| <b>White Male (High RF profile)</b>           | 50  | Current | 150 | Yes                | 126                | Yes                   | 35                 | 250                  | 30                 | 120             | 22.5%     |
| <b>Black Male (Optimal RF profile)</b>        | 50  | Never   | 120 | No                 | 90                 | No                    | 22                 | 180                  | 55                 | 90              | 0.8%      |
| <b>Black Male (Intermediate RF profile)</b>   | 50  | Never   | 130 | No                 | 100                | No                    | 28                 | 200                  | 50                 | 120             | 1.7%      |
| <b>Black Male (High RF profile)</b>           | 50  | Current | 150 | Yes                | 126                | Yes                   | 35                 | 250                  | 30                 | 120             | 24.8%     |
| <b>White Female (Optimal RF profile)</b>      | 50  | Never   | 120 | No                 | 90                 | No                    | 22                 | 180                  | 55                 | 90              | 0.3%      |
| <b>White Female (Intermediate RF profile)</b> | 50  | Never   | 130 | No                 | 100                | No                    | 28                 | 200                  | 50                 | 120             | 0.6%      |
| <b>White Female (High RF profile)</b>         | 50  | Current | 150 | Yes                | 126                | Yes                   | 35                 | 250                  | 30                 | 120             | 14.2%     |
| <b>Black female (Optimal RF profile)</b>      | 50  | Never   | 120 | No                 | 90                 | No                    | 22                 | 180                  | 55                 | 90              | 0.4%      |
| <b>Black female (Intermediate RF profile)</b> | 50  | Never   | 130 | No                 | 100                | No                    | 28                 | 200                  | 50                 | 120             | 1.2%      |
| <b>Black female (High RF profile)</b>         | 50  | Current | 150 | Yes                | 126                | Yes                   | 35                 | 250                  | 30                 | 120             | 26.0%     |



**Online Table 8.** An example calculation of risk for each race and sex group for an individual 50-years of age (for which the Ln[Age]=3.91 with a fasting glucose of 100mg/dL, total cholesterol of 200mg/dL, HDL-cholesterol of 50mg/dL, BMI of 28kg/m<sup>2</sup>, systolic blood pressure of 130mm Hg, and QRS of

|  | White Men | White Women | Black Men | Black Women |
|--|-----------|-------------|-----------|-------------|
|--|-----------|-------------|-----------|-------------|

120ms. This individual is not a current smoker and is not currently treated for hypertension or diabetes. For the equations, the values for age, lipids, BMI, fasting glucose, systolic BP, and QRS duration are Ln transformed. Interactions use the natural log of each variable. Regression coefficients from Table 2 are used to calculate risk using the formula  $1 - S_0 e^{(IndX - MeanCV)}$  where  $S_0$  represents baseline survival for the appropriate race-sex group, IndX represents the sum of the coefficient x value for each individual following log transformation where appropriate, and MeanCV represents the Mean (Coefficient x value) for the appropriate race-sex group.

|                                                                                                                                                                                                                                                                            | Coefficient | Individual Example Value | Coefficient x Value | Coefficient | Individual Example Value | Coefficient x Value | Coefficient | Individual Example Value | Coefficient x Value | Coefficient | Individual Example Value | Coefficient x Value |
|----------------------------------------------------------------------------------------------------------------------------------------------------------------------------------------------------------------------------------------------------------------------------|-------------|--------------------------|---------------------|-------------|--------------------------|---------------------|-------------|--------------------------|---------------------|-------------|--------------------------|---------------------|
| <b>Hypothetical Profile: 50-year-old with a systolic blood pressure of 130mm Hg (not on treatment), non-smoker, fasting glucose of 100 mg/dL (not on treatment), BMI of 28 kg/m<sup>2</sup>, total cholesterol of 200mg/dL, HDL of 50 mg/dL, and QRS duration of 120ms</b> |             |                          |                     |             |                          |                     |             |                          |                     |             |                          |                     |
| Ln Age (y)                                                                                                                                                                                                                                                                 | 41.94101    | 3.912023005              | 164.074196          | 20.54973    | 3.912023005              | 80.39101652         | 2.88334     | 3.912023005              | 11.2796924          | 51.75667    | 3.912023005              | 202.473284          |
| Ln Age, Squared                                                                                                                                                                                                                                                            | -0.88115    | 15.30392399              | -13.48505263        | N/A         | 15.30392399              | 0                   | N/A         | 15.30392399              | 0                   | N/A         | 15.30392399              | 0                   |
| Ln Treated Systolic BP (mm Hg)                                                                                                                                                                                                                                             | 1.030508    | 0                        | 0                   | 12.94937    | 0                        | 0                   | 2.31106     | 0                        | 0                   | 28.97791    | 0                        | 0                   |
| Ln Age x Ln Treated Systolic BP                                                                                                                                                                                                                                            | N/A         | 0                        | 0                   | -2.96923    | 0                        | 0                   | N/A         | 0                        | 0                   | -6.59777    | 0                        | 0                   |
| Ln Untreated Systolic BP (mm Hg)                                                                                                                                                                                                                                           | 0.91252     | 4.86753445               | 4.441722537         | 11.86273    | 4.86753445               | 57.74224695         | 2.17229     | 4.86753445               | 10.5736964          | 28.1853     | 4.86753445               | 137.192919          |
| Ln Age x Ln Untreated Systolic BP                                                                                                                                                                                                                                          | N/A         | 19.04190675              | 0                   | -2.72538    | 19.04190675              | -51.89643182        | N/A         | 19.04190675              | 0                   | -6.42425    | 19.04190675              | -122.329969         |
| Current Smoker (1=Yes, 0=No)                                                                                                                                                                                                                                               | 0.73839     | 0                        | 0                   | 11.01752    | 0                        | 0                   | 1.65337     | 0                        | 0                   | 0.76532     | 0                        | 0                   |
| Ln Age x Current Smoker                                                                                                                                                                                                                                                    | N/A         | 0                        | 0                   | -2.50777    | 0                        | 0                   | -0.24665    | 0                        | 0                   | N/A         | 0                        | 0                   |
| Ln Treated glucose (mg/dL)                                                                                                                                                                                                                                                 | 0.90072     | 0                        | 0                   | 1.04503     | 0                        | 0                   | 0.64704     | 0                        | 0                   | 0.96695     | 0                        | 0                   |
| Ln Untreated glucose (mg/dL)                                                                                                                                                                                                                                               | 0.77805     | 4.605170186              | 3.583052663         | 0.91807     | 4.605170186              | 4.227868593         | 0.57891     | 4.605170186              | 2.66597907          | 0.79561     | 4.605170186              | 3.66391945          |
| Ln Total Cholesterol (mg/dL)                                                                                                                                                                                                                                               | 0.49323     | 5.298317367              | 2.613289075         | N/A         | 5.298317367              | 0                   | N/A         | 5.298317367              | 0                   | 0.32646     | 5.298317367              | 1.72968869          |
| Ln HDL-C (mg/dL)                                                                                                                                                                                                                                                           | -0.43683    | 3.912023005              | -1.708889009        | -0.07455    | 3.912023005              | -0.291641315        | -0.80691    | 3.912023005              | -3.1566505          | N/A         | 3.912023005              | 0                   |
| Ln BMI (Kg/m <sup>2</sup> )                                                                                                                                                                                                                                                | 37.21577    | 3.33220451               | 124.0105566         | 1.32948     | 3.33220451               | 4.430099252         | 1.16289     | 3.33220451               | 3.8749873           | 21.24763    | 3.33220451               | 70.8014485          |
| Ln Age x Ln BMI                                                                                                                                                                                                                                                            | -8.83278    | 13.0356607               | -115.1411231        | N/A         | 13.0356607               | 0                   | N/A         | 13.0356607               | 0                   | -5.00068    | 13.0356607               | -65.1871678         |
| Ln QRS duration (msec)                                                                                                                                                                                                                                                     | 0.63224     | 4.787491743              | 3.026843779         | 1.06089     | 4.787491743              | 5.079002115         | 0.72646     | 4.787491743              | 3.47792125          | 1.27475     | 4.787491743              | 6.1028551           |
| Individual Sum                                                                                                                                                                                                                                                             | N/A         | N/A                      | 171.4145959         | N/A         | N/A                      | 99.68216029         | N/A         | N/A                      | 28.715626           | N/A         | N/A                      | 234.446977          |
| Mean (Coefficient x Value)                                                                                                                                                                                                                                                 | N/A         | N/A                      | 171.59              | N/A         | N/A                      | 99.7321             | N/A         | N/A                      | 28.7369             | N/A         | N/A                      | 233.978             |
| Baseline Survival                                                                                                                                                                                                                                                          | N/A         | N/A                      | 0.98752             | N/A         | N/A                      | 0.99348             | N/A         | N/A                      | 0.98295             | N/A         | N/A                      | 0.9926              |
| Estimated 10-y risk of HF (%)                                                                                                                                                                                                                                              | N/A         | N/A                      | 1.048275525%        | N/A         | N/A                      | 0.620337702%        | N/A         | N/A                      | 1.66941215%         | N/A         | N/A                      | 1.18016393%         |

**Online Figure 1. Sex- and Race-Specific Calibration Plots in Derivation Sample of the Pooled Cohort (n=11,771) with Discrimination and Calibration\* Statistics.**

**A. White Male, N=3997**

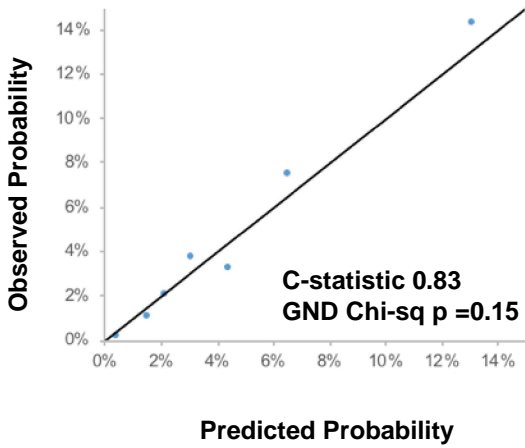

**B. Black Male, N=933**

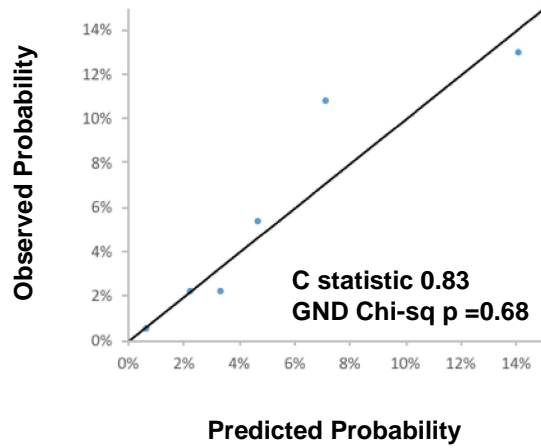

**C. White Female, N=5213**

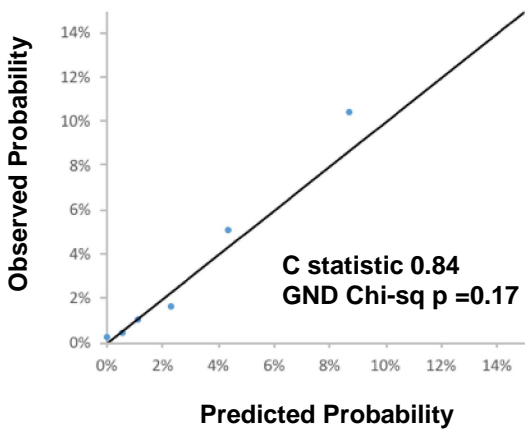

**D. Black Female, N=1628**

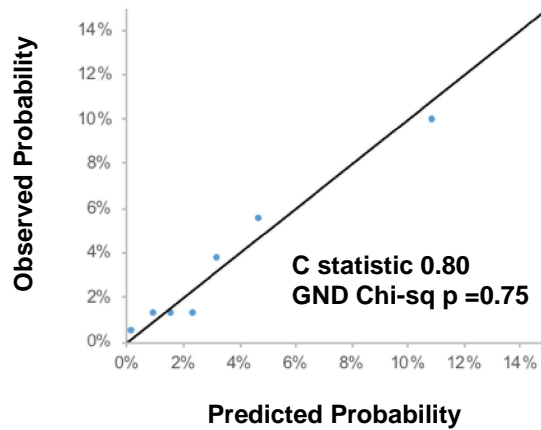

\*Deciles of risk were collapsed when fewer than 2 events were observed in any group

**Online Figure 2. Sex- and Race-Specific Calibration Plots\* in Derivation Sample of the Pooled Cohort (n=11,770) Demonstrating Observed (Blue) and Predicted (Orange) mean 10-year risk of HF, stratified by Predicted Risk.**

**A. White Male, N=3997**

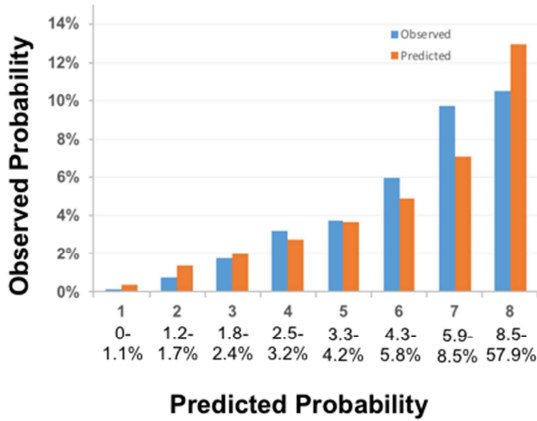

**B. Black Male, N=933**

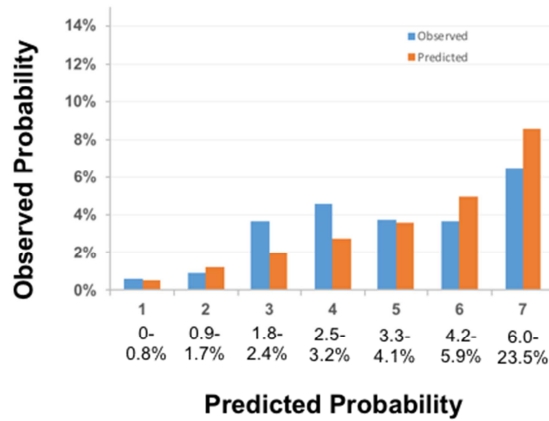

**C. White Female, N=5213**

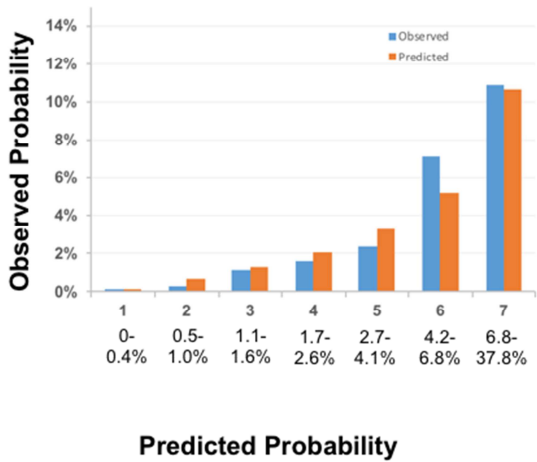

**D. Black Female, N=1628**

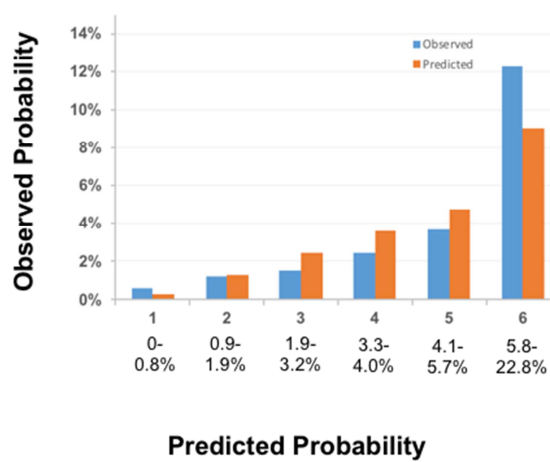

\*Deciles of risk were collapsed when fewer than 2 events were observed in any group

## **Online Supplemental Methods: Cohort Descriptions and Outcome Ascertainment**

### **Derivation Study Samples**

#### Framingham Offspring Study

The Framingham Heart Study offspring cohort recruited participants in 1971 and detailed methods have been previously published.(1) Briefly, participants have been followed with physical examinations and blood tests every 2 to 4 years. At each visit, HF events were identified, all hospital records reviewed, and diagnosis of HF confirmed by a panel of three physicians.(1) After excluding individuals due to prevalent CVD or HF, age < 30 years, and due to missing covariates, 1881 individuals were included in the derivation cohort and 1892 were included in the internal validation cohort.

#### Multi-Ethnic Study of Atherosclerosis (MESA)

The MESA cohort recruited asymptomatic participants ages 45 to 84 years from six US communities between 2000-2002, and included white, black, Hispanic, and Asian individuals with detailed methods previously described.(2). All participants were contacted by telephone every 6 to 9 months to inquire about interim hospitalizations and medical records were obtained. HF events were adjudicated by two physicians after review of all available study visits and medical records. Any disagreements were classified by full review committee as previously published.(3) After exclusions due to age>80 and due to missing covariates, 1787 individuals were included in the derivation cohort and 1860 in the internal validation cohort.

#### Atherosclerosis Risk in Communities Study

The ARIC Study recruited men and women ages 45 to 64 years sampled from 4 US communities with detailed methods previously published.(4) Three methods were used for ascertainment of events: 1) participants were contacted annually by phone and records were obtained for any hospitalizations, 2) local hospitals provided lists of hospital discharges with cardiovascular diagnoses, and 3) health department death certificate files were surveyed. Incident HF was defined as the first HF hospitalization or presence of HF code on the death certificate in any position using the *International Classification of Diseases Code, Ninth Revision (ICD-9)* code 428.x and deaths with *ICD-9/10* codes of either 428.x or I50. After excluding individuals due to prevalent CVD or HF and due to missing covariates, 5059 individuals were included in the derivation cohort and 5132 were included in the internal validation cohort.

### Coronary Artery Risk Development in Young Adults Study

The CARDIA study recruited 5115 blacks and whites in 1985-1986 from Birmingham, Alabama; Chicago; Minneapolis; and Oakland, California with full details previously described.(5) All participants were contacted annually by telephone and during scheduled study examinations to report interim hospitalizations. Two members of the endpoint committee adjudicated all hospitalizations and deaths with disagreements resolved by consensus. Hospitalization for heart failure required both that a final diagnosis of heart failure had been made by a physician and that medical treatment for heart failure had been administered during the hospitalization. Death was considered to be due to heart failure if the adjudicated cause was cardiovascular and if an *International Classification of Diseases, Ninth Revision (ICD-9)* code for heart failure (428) or cardiomyopathy (425) was noted as a contributory cause. Deaths were reported to the field centers every 6 months, and records were requested after consent had been obtained from the next of kin. After excluding participants with age<30 and due to missing covariates, 1805 individuals were included in the derivation cohort and 1706 individuals were included in the internal validation cohort.

### Cardiovascular Health Study

The CHS cohort recruited participants from four locations—Forsyth County, North Carolina; Sacramento County, California; Allegheny County, Pennsylvania; and Washington County, Maryland and detailed methods have been previously described(6). CHS participants were classified at baseline according to the presence or absence of preexisting disease for the six cardiovascular outcomes using hospital records and physician confirmation as previously published(7). Ascertainment of HF events and deaths were performed during clinic visits and surveillance calls and records were subsequently obtained. HF was subsequently adjudicated by the CHS Events Subcommittee(8). After excluding individuals with baseline prevalent CVD and missing covariates, 1239 individuals were included in the derivation cohort and 1180 individuals were included in the internal validation cohort.

### **Validation Cohort Descriptions**

#### Jackson Heart Study

The Jackson Heart Study has been previously described in detail.(9) Briefly, participants were recruited in 2000 from the Jackson, MI cohort of the ARIC study and from the overall tricounty population. Participants from the

ARIC study were excluded from the validation analysis as they had already been included in the pooled cohort derivation and internal validation samples. The Jackson Heart Study cohort surveillance system collects follow-up data on all participants, including deaths, study terminations (from 2000 through 2010), and heart failure hospitalizations (from 2005). Because adjudication for HF hospitalizations did not start until 2005, self-reported HF hospitalization status from annual follow-up data was utilized. Heart failure hospitalizations after 2005 were adjudicated by trained and certified abstractors and required (1) a discharge diagnosis of *International Classification of Diseases, Ninth Revision, Clinical Modification (ICD-9-CM)* code 428 and/or underlying cause of death code I50 and (2) radiographic, hemodynamic, or ECG findings of heart failure or (3) autopsy finding of pulmonary edema or heart failure. After exclusion for overlap with ARIC, history of prevalent CVD, and missing covariates, 2770 individuals were included in the analysis. Given median follow-up time did not reach 10 years (approximately 8 years), we estimated 8-year risk to achieve a more robust calibration assessment.

#### Prevention of Renal and Vascular End-stage Disease (PREVEND)

The PREVEND cohort was recruited in 1997-1998 and has been previously described(10). In brief, all inhabitants of the city of Groningen, the Netherlands, were invited to participate and among those who responded, individuals with urinary albumin excretion  $> 10$  mg/L and a randomly selected control group with urinary albumin excretion  $\leq 10$  mg/L were enrolled. Initial cardiovascular events were adjudicated by review of all hospital records and incident cases were deemed to be HF based on an endpoint adjudication committee consensus utilizing the European Society of Heart Failure Guidelines, as previously published.(11) Participants were included in this analysis if they were between the ages of 30-80 years and had available data on all covariates needed to calculate PCP-HF risk score. Individuals with a prior history of coronary heart disease, stroke, or heart failure were excluded. Of 8592 individuals who attended PREVEND exam 1 (1997-1998), 6699 met criteria for this study and were included in the analysis.

## REFERENCES

1. Kannel WB, Feinleib M, McNamara PM, Garrison RJ, Castelli WP. An investigation of coronary heart disease in families. The Framingham offspring study. *Am J Epidemiol* 1979;110:281-90.
2. Bild DE, Bluemke DA, Burke GL et al. Multi-Ethnic Study of Atherosclerosis: objectives and design. *Am J Epidemiol* 2002;156:871-81.
3. Choi EY, Rosen BD, Fernandes VR et al. Prognostic value of myocardial circumferential strain for incident heart failure and cardiovascular events in asymptomatic individuals: the Multi-Ethnic Study of Atherosclerosis. *Eur Heart J* 2013;34:2354-61.
4. The Atherosclerosis Risk in Communities (ARIC) Study: design and objectives. The ARIC investigators. *Am J Epidemiol* 1989;129:687-702.
5. Friedman GD, Cutter GR, Donahue RP et al. CARDIA: study design, recruitment, and some characteristics of the examined subjects. *J Clin Epidemiol* 1988;41:1105-16.
6. Fried LP, Borhani NO, Enright P et al. The Cardiovascular Health Study: design and rationale. *Ann Epidemiol* 1991;1:263-76.
7. Psaty BM, Kuller LH, Bild D et al. Methods of assessing prevalent cardiovascular disease in the Cardiovascular Health Study. *Ann Epidemiol* 1995;5:270-7.
8. Ives DG, Fitzpatrick AL, Bild DE et al. Surveillance and ascertainment of cardiovascular events. The Cardiovascular Health Study. *Ann Epidemiol* 1995;5:278-85.
9. Taylor HA, Jr., Wilson JG, Jones DW et al. Toward resolution of cardiovascular health disparities in African Americans: design and methods of the Jackson Heart Study. *Ethn Dis* 2005;15:S6-4-17.
10. Diercks GF, Janssen WM, van Boven AJ et al. Rationale, design, and baseline characteristics of a trial of prevention of cardiovascular and renal disease with fosinopril and pravastatin in nonhypertensive, nonhypercholesterolemic subjects with microalbuminuria (the Prevention of REnal and Vascular ENdstage Disease Intervention Trial [PREVEND IT]). *Am J Cardiol* 2000;86:635-8.
11. Brouwers FP, de Boer RA, van der Harst P et al. Incidence and epidemiology of new onset heart failure with preserved vs. reduced ejection fraction in a community-based cohort: 11-year follow-up of PREVEND. *Eur Heart J* 2013;34:1424-31.
